# Supplementary material
Source: PubMed Central journal article supplement (PMC4507293)
Supplement: NIHMS698152-supplement-1.pdf [file NIHMS698152-supplement-1.pdf]

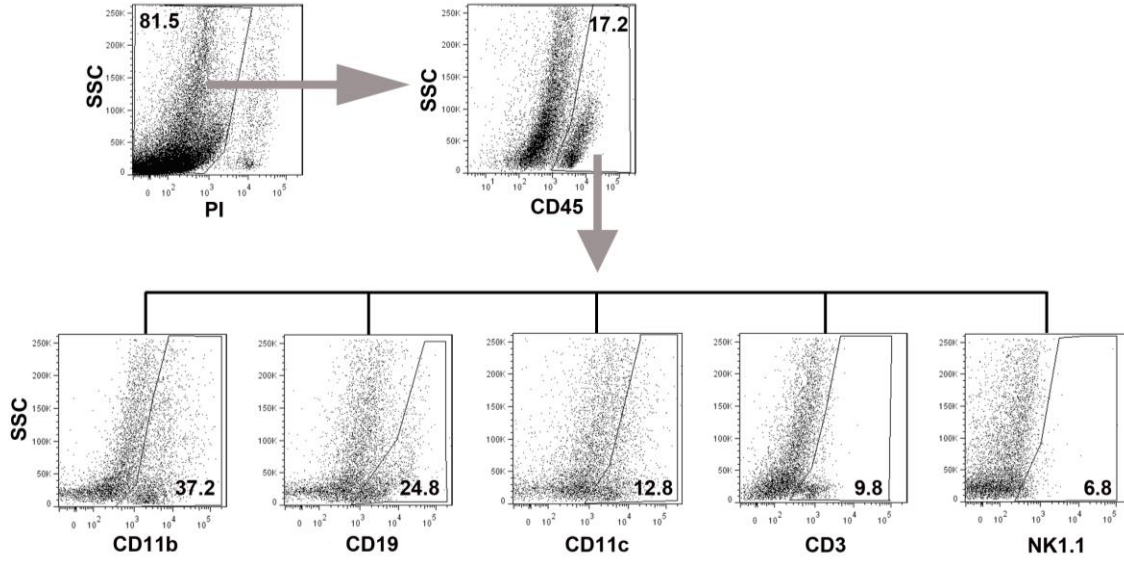

**Supplementary Figure 1. Gating strategy for flow cytometry analysis of mouse aorta.** Cell suspensions from mouse aorta digested with enzyme cocktail were stained with propidium iodide (PI), anti-CD45 (FITC), anti-CD11b (PerCy5.5), anti-CD19 (APC.Cy7), and anti-CD11c (PE), anti-CD3 (APC), and anti-NK1.1(PE.Cy7) antibodies; numbers in the gate in the top two panels represent the percentage of PI<sup>-</sup> and CD45<sup>+</sup> cells of all analyzed cells. The numbers in the bottom five panels represent the percentages of CD11b<sup>+</sup>, CD19<sup>+</sup>, CD11c<sup>+</sup>, CD3<sup>+</sup> and NK1.1<sup>+</sup> cells among all PI<sup>-</sup> CD45<sup>+</sup> cells.

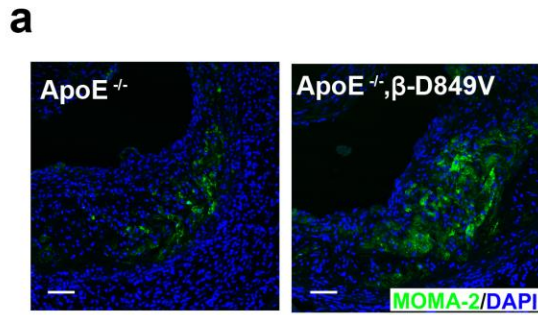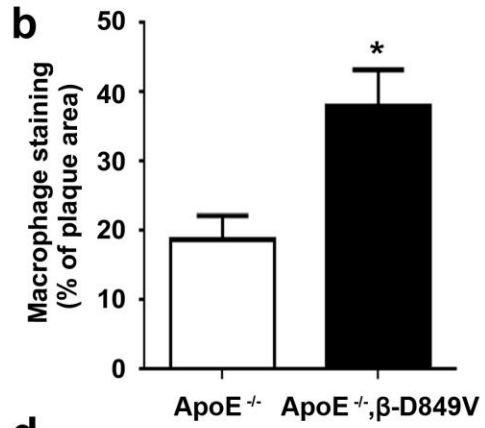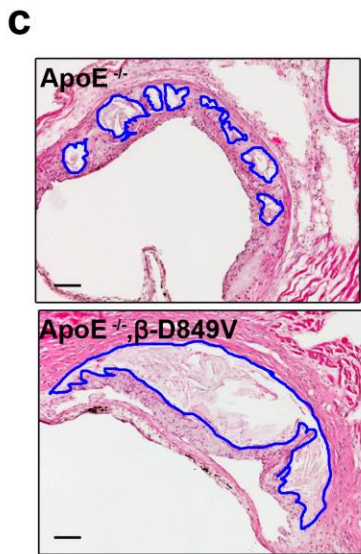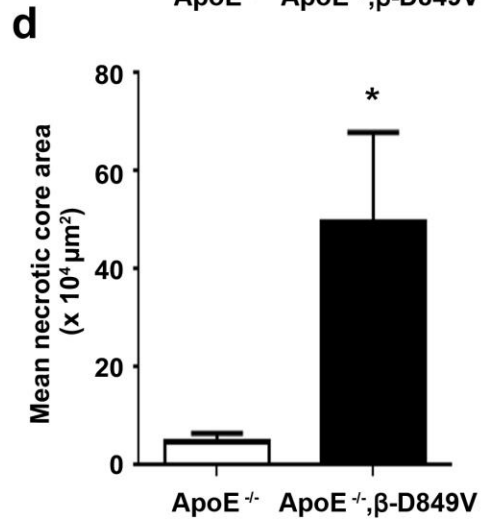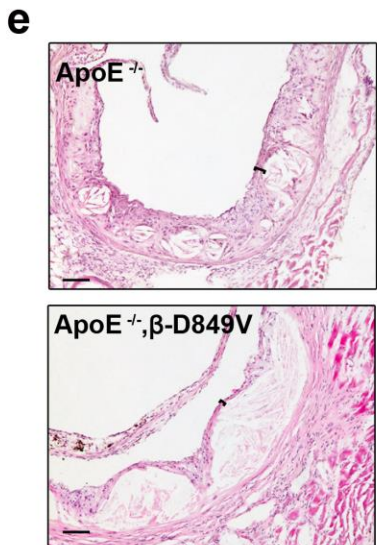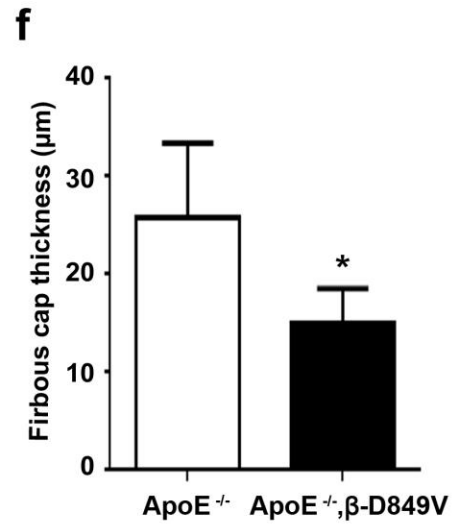

**Supplementary Figure 2. Macrophage area, necrotic core area and fibrous cap thickness.**

(a) Cross sections from the aortic roots of ApoE<sup>-/-</sup> and ApoE<sup>-/-</sup>, β-D849V mice after 8 weeks of WD were stained with MOMA2 antibody(green). (b) Macrophage staining was quantified from ApoE<sup>-/-</sup> and ApoE<sup>-/-</sup>, β-D849V mice in (a) and expressed as percent of total plaque area (n=6). (c) Representative images of aortic root cross sections from ApoE<sup>-/-</sup> and ApoE<sup>-/-</sup>, β-D849V mice after 16 weeks of WD stained with H&E. Blue lines show the boundary of the necrotic core. (d) Quantification of necrotic core size in aortic roots from mice in (c) (n=7). (e) Representative sections of aortic roots from ApoE<sup>-/-</sup> and ApoE<sup>-/-</sup>, β-D849V mice after 16 weeks of WD stained with H&E. Bracketed regions show a representative measurement of the fibrous cap thickness.(f) Quantitative analysis of fibrous cap thickness in (e) (n=7), All data were assessed using Student's *t*-test and are present as mean ± s.e.m. \**P*<0.01. Scale bar, 100μm.

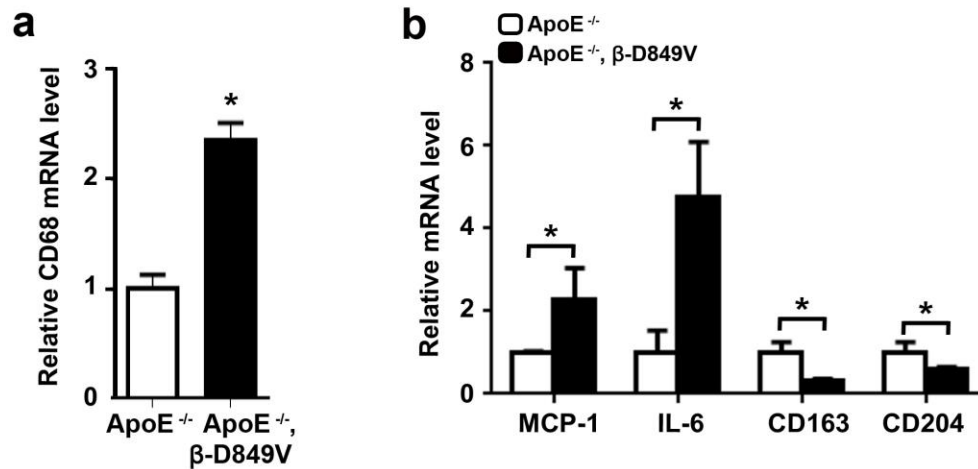

**Supplementary Figure 3. Expression of M1 and M2 macrophage markers.** (a) RNA was extracted from aortic arches of ApoE<sup>-/-</sup> and ApoE<sup>-/-</sup>, β-D849V mice after 16 weeks of WD. mRNA levels of a common macrophage marker CD68 were measured and normalized to GAPDH by qRT-PCR(n=3). (b) Expression of M1 macrophage markers (MCP-1, IL-6) and M2 macrophage markers (CD163, CD204) in aortic arches of ApoE<sup>-/-</sup> and ApoE<sup>-/-</sup>, β-D849V mice after 16 weeks of WD was quantified and normalized to CD68 expression by qRT-PCR(n=3). \**P*<0.05 by Student's *t*-test. All data represent mean ± s.e.m..

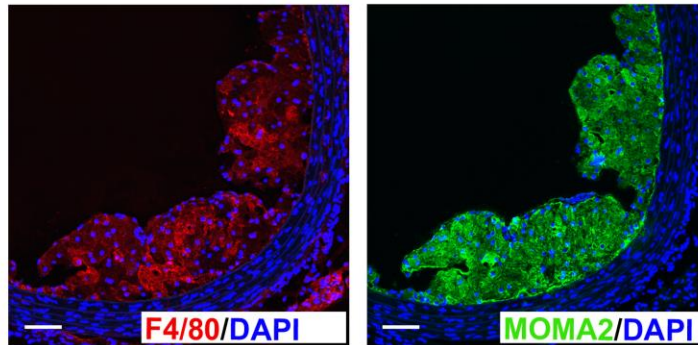

**Supplementary Figure 4. F4/80 and MOMA2 staining of macrophages in the descending aorta.** Consecutive cross sections from ApoE<sup>-/-</sup>,  $\beta$ -D849V mice after 8 weeks of WD were stained with F4/80 antibody (red) and MOMA2 antibody (green). Scale bar, 100 $\mu$ m.

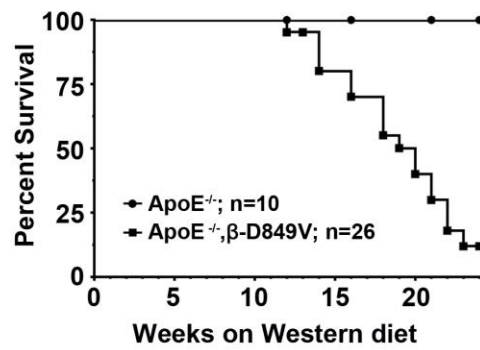

**Supplementary Figure 5. Survival curve for ApoE<sup>-/-</sup> and ApoE<sup>-/-</sup>, β-D849V mice on WD.**

ApoE<sup>-/-</sup> and ApoE<sup>-/-</sup>, β-D849V mice were fed WD at 4 weeks of age for 24 weeks. ApoE<sup>-/-</sup>, β-D849V mice show significantly decreased survival on WD.

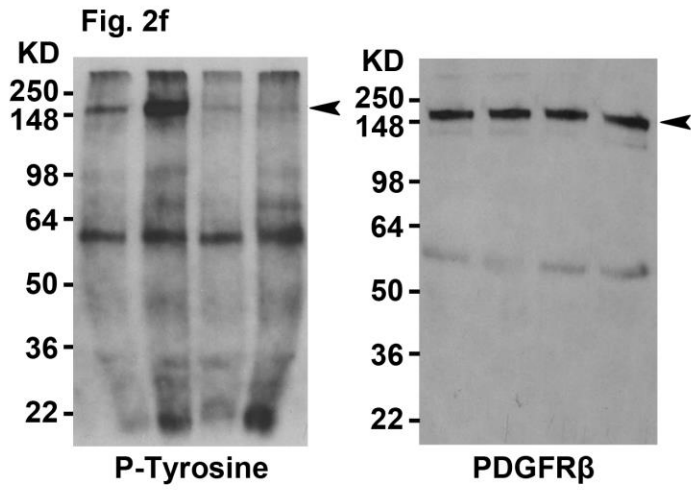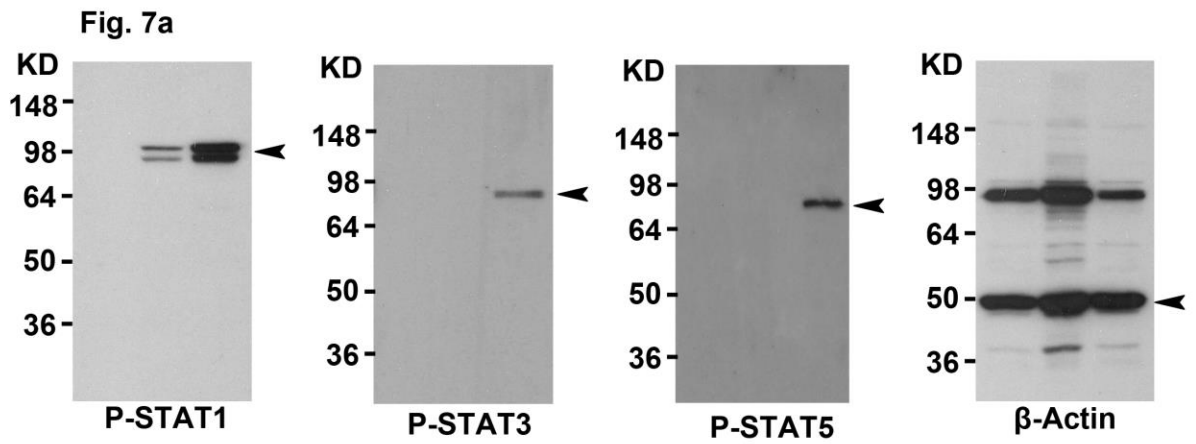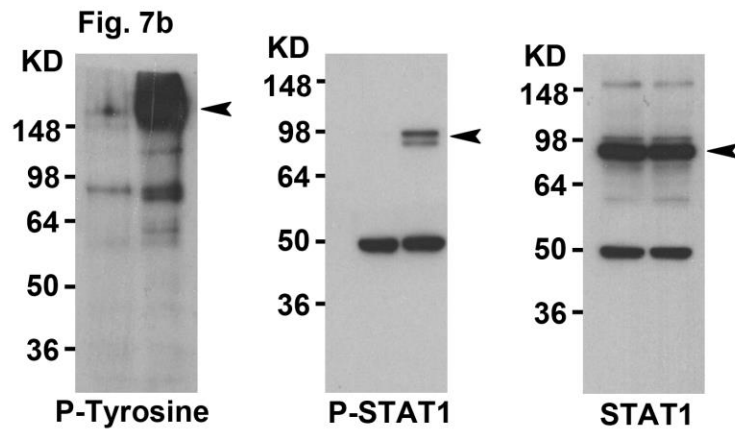

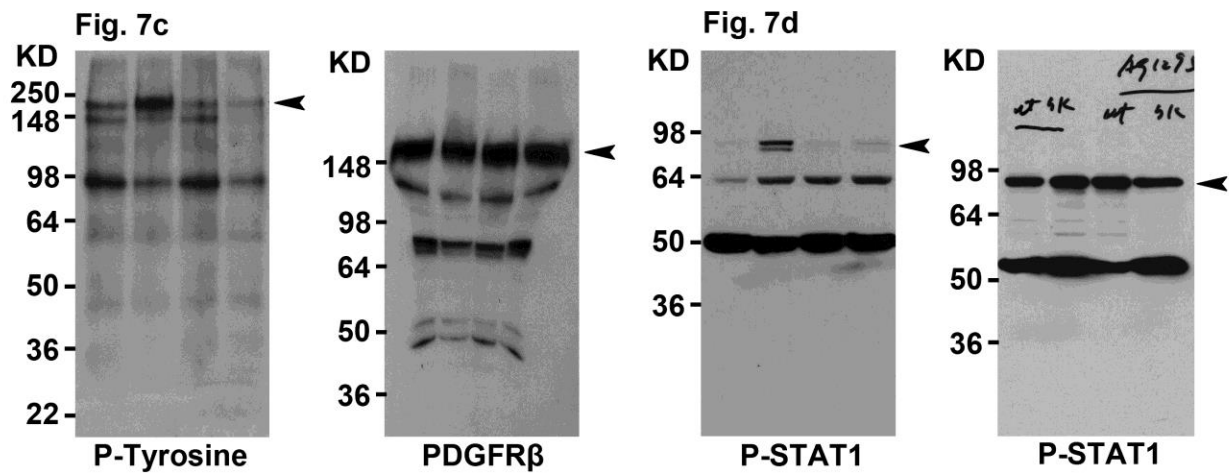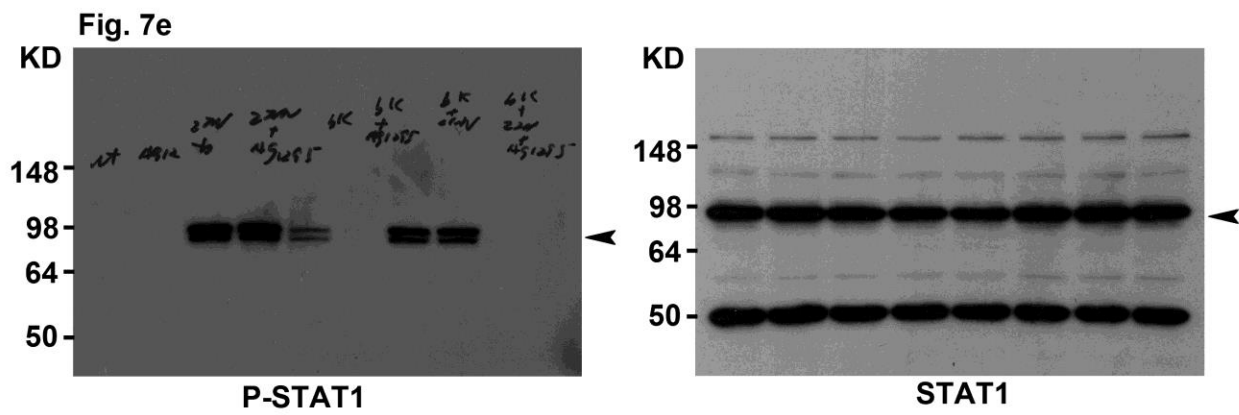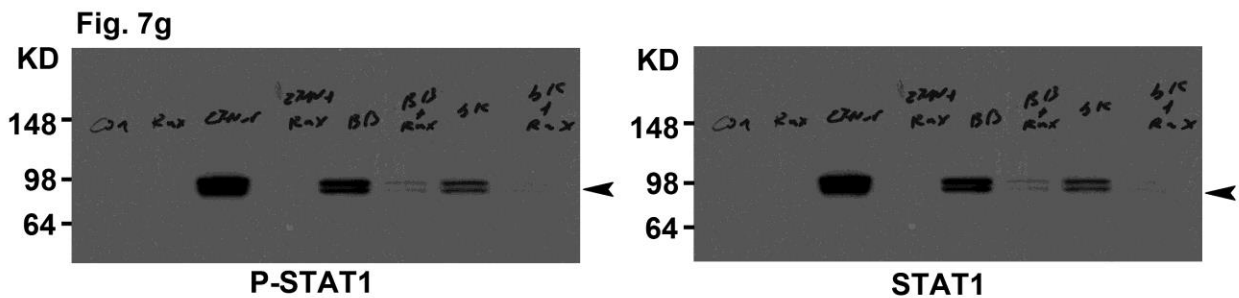



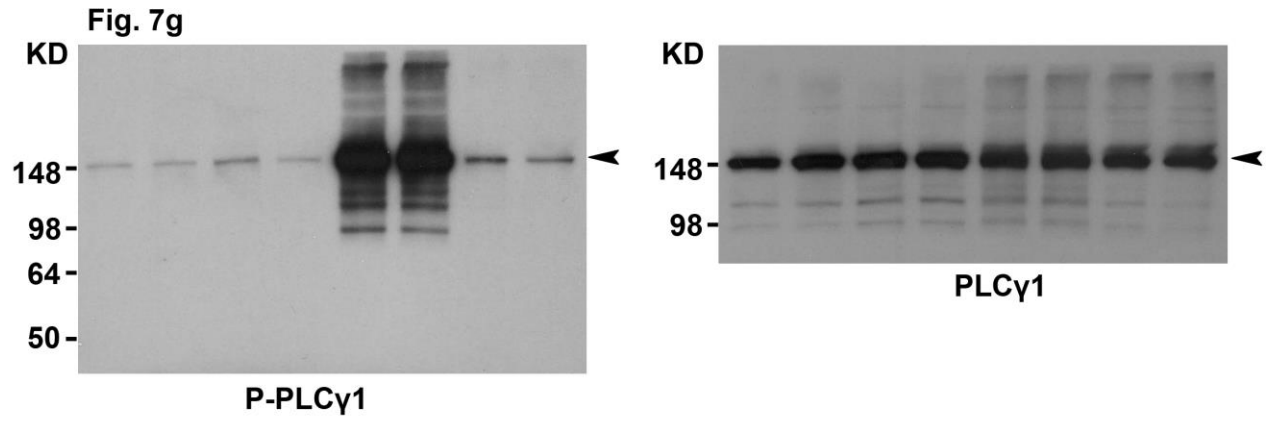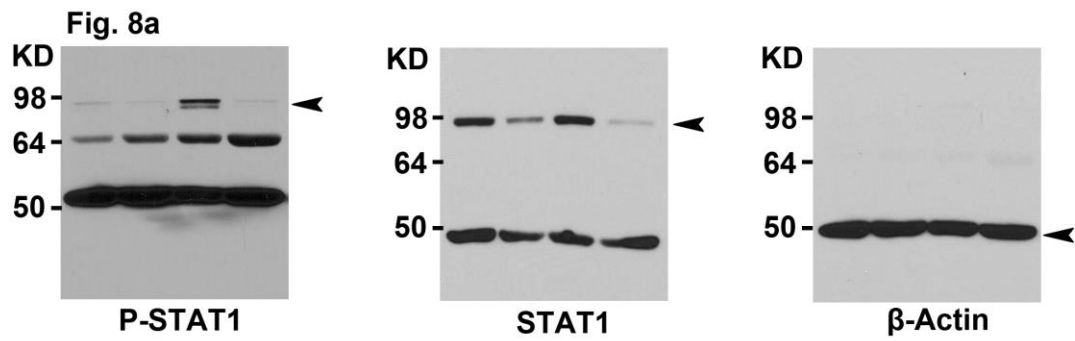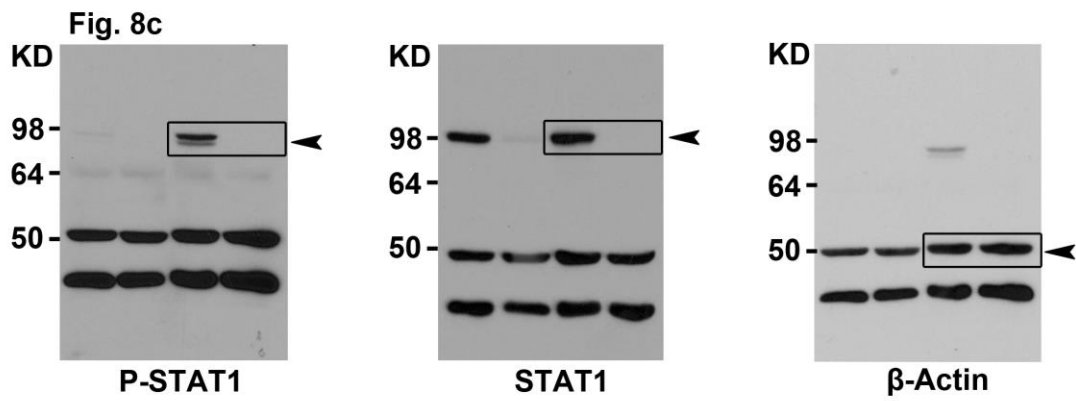

Supplementary Figure 6. Full scans of Western blots in the main text.

**Supplementary Table1. Primers for Real-Time PCR**

| <b>Name</b>   | <b>Forward</b>           | <b>Reverse</b>           |
|---------------|--------------------------|--------------------------|
| IL-1 $\beta$  | ATGGGCAACCACTTACCTATTT   | GTTCTAGAGAGTGCTGCCTAATG  |
| TNF- $\alpha$ | CTGAGTTCTGCAAAGGGAGAG    | CCTCAGGGAAGAATCTGGAAAG   |
| IFN- $\alpha$ | GATGCCCAGCAGATCAAGAA     | CATGCAGCAGATGAGTCCTT     |
| IFN- $\beta$  | ATCCAAGAGATGCTCCAGAATG   | CCAGGAGACGTACAACAATAGTC  |
| IFN- $\gamma$ | CTCTTCCTCATGGCTGTTTCT    | TTCTTCCACATCTATGCCACTT   |
| CCL2          | AGCACCCAGCCAACTCTCACT    | CGTAACTGCATCTGGCTGA      |
| CCL3          | ATACAAGCAGCAGCGAGTACCAGT | ACAGAGAAGAACAGCAAGGGCAGT |
| CCL5          | TCGTGCCACAGTCAAGGAGTATTT | TCTTCTCTGGGTTGGCACACACTT |
| CCL6          | AAATACCAGGGCAGGCCAGAGAAT | ACCCAAGGACAGCCACAAGGATAA |
| CCL7          | ACCAACCTAGGAGCCAAGAAGCAA | AAGACCATTCTTAGGGCGTGACCA |
| CCL9          | GCCGGGCATCATCTTTATCAGCAA | TGGCAGTTTACACCCTTCTCTTCA |
| CCL12         | ACCATCAGTCCTCAGGTATTGGCT | ACTGGCTGCTTGTGATTCTCCTGT |
| CXCL9         | ATCTTCCTGGAGCAGTGTGGAGTT | AGGGATTTGTAGTGGATCGTGCCT |
| CXCL10        | ATATCGATGACGGGCCAGTGAGAA | AATGATCTCAACACGTGGGCAGGA |
| CXCL11        | AACGGCTGCGACAAAGTTGAAGTG | TATGAGGCGAGCTTGCTTGGATCT |
| Col1a2        | TCTCCTGGAAATGTTGGCCCATCT | AATCCGATGTTGCCAGCTTCACCT |
| Col3a1        | AGGTGGACCAGGCAATGATGGAAA | TTCCTTTAGGACCAGGGAAACCCA |
| Tnc           | TATCGCAACTGGAAGGCCTATGCT | TTGCTCAGGTTATCCAGTCCAAGC |
| Vcan          | TGTGGATCATCTGGATGGCGATGT | CAAAGCCATTTCTCCAAGCTGCCT |
| Bgn           | AGCTCCTCCAGGTTGTCTAT     | CAAGAGGGCCTACTATAATGGC   |
| MCP-1         | CTCACCTGCTGCTACTCATTC    | ACTACAGCTTCTTTGGGACAC    |
| IL-6          | CCAGAGTCCTTCAGAGAGATACA  | CCTTCTGTGACTCCAGCTTATC   |
| CD163         | TGACGACAACCTTCAGCAAAGA   | CCAGAACCAGCTCCCAATTTA    |
| CD206         | CCAAATGATGAGCTGTGGATTG   | GCTCTCCAGGAAGCCATTTA     |
| GAPDH         | CTGGAGAAACCTGCCAAGTA     | AAGAGTGGGAGTTGCTGTTG     |
